# Supplementary material for: IgA2 Antibodies against SARS-CoV-2 Correlate with NET Formation and Fatal Outcome in Severely Diseased COVID-19 Patients
Source: PubMed Central journal article supplement (PMC7764693; doi:10.3390/cells9122676), 2020-12-12
Supplement: cells-09-02676-s001.pdf [file cells-09-02676-s001.pdf]

## Supplementary Materials: IgA2 Antibodies against SARS-CoV-2 Correlate with NET Formation and Fatal Outcome in Severely Diseased COVID-19 Patients

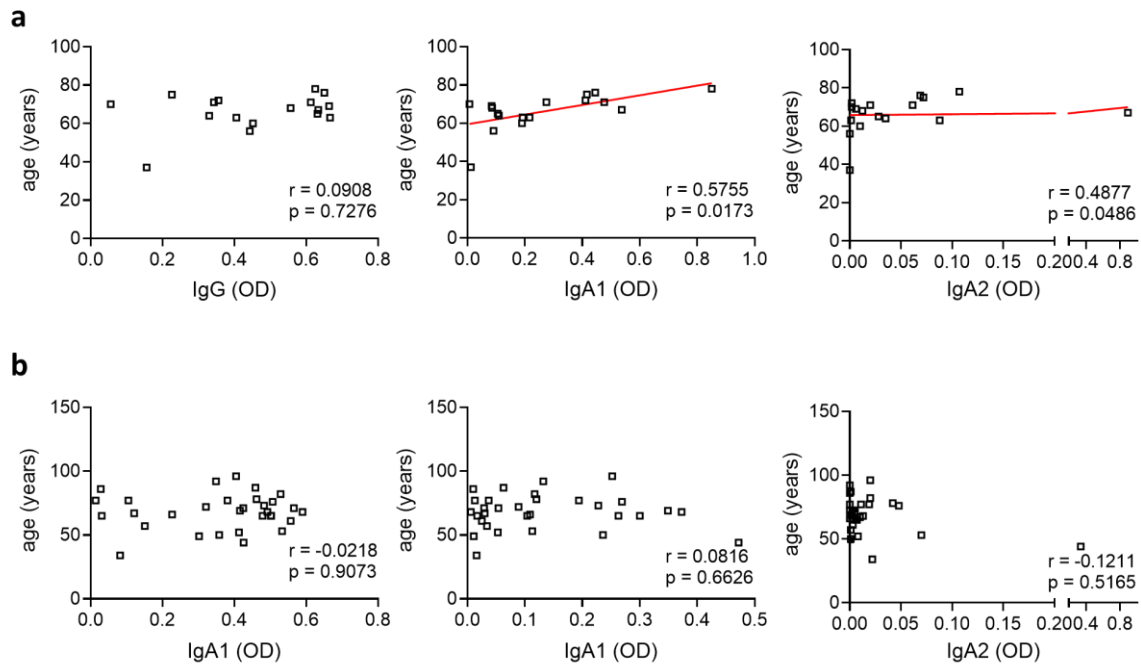

**Figure S1.** SARS-CoV-2 specific IgA1 and IgA2 levels correlate with age in severely diseased patients. Correlation of levels of IgG, IgA1 and IgA2 directed against SARS-CoV-2 with age in the plasma of SARS-CoV-2-infected patients with severe (**a**) ( $N = 17$ ) or moderate (**b**) disease ( $N = 31$ ). Significances were tested with Spearman's correlation coefficient. \* $p < 0.05$ ; \*\* $p < 0.01$ ; and \*\*\* $p < 0.001$ . Data are presented as scatter plots with mean  $\pm$  s.e.m. or scatter plots.

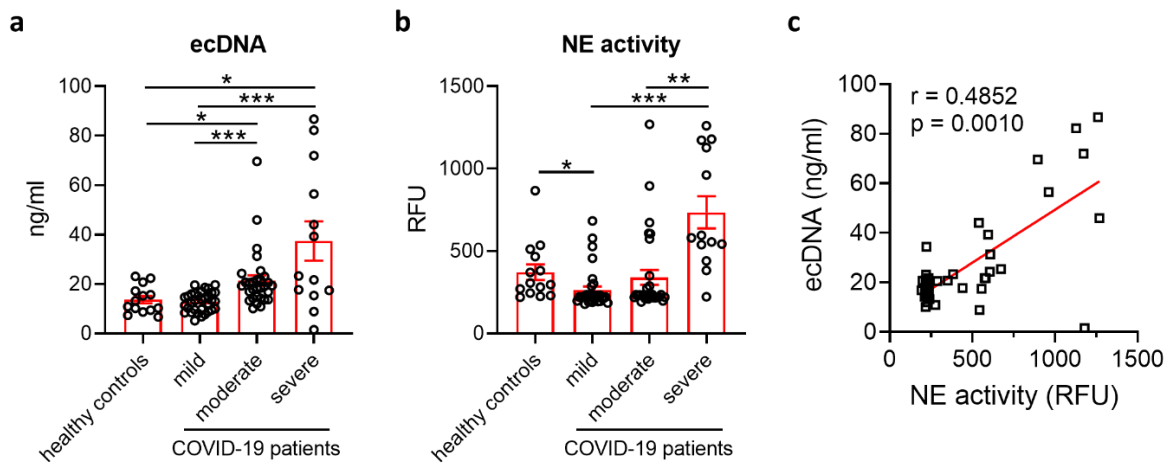

**Figure S2.** ecDNA and NE activity are elevated in patients with moderate and severe disease. **(a,b)** Amounts of **(a)** ecDNA and **(b)** NE activity in the plasma of healthy control subjects ( $N = 14$ ) as well as SARS-CoV-2-infected patients with no or mild disease symptoms ( $N = 33$ ) moderate symptoms ( $N = 30$ ) or severe symptoms requiring intensive care treatment ( $N = 13$ ). **(c)** Correlation of ecDNA with NE activity in the plasma of SARS-CoV-2-infected patients with moderate or severe symptoms ( $N = 43$ ). Significances were tested with Kruskal-Wallis test followed by Dunn's multiple comparison test for all groups **(a+b)** and with Spearman's correlation coefficient **(c)**. \* $p < 0.05$ ; \*\* $p < 0.01$ ; and \*\*\* $p < 0.001$ . Data are presented as scatter plots with mean  $\pm$  s.e.m. or scatter plots.
